# Supplementary material for: Control of chemoselectivity in Dieckmann ring closures leading to tetramic acids
Source: Royal Society of Chemistry journal article supplement (doi:10.1039/c1ob05816a), 2011-01-01

## Supplementary Data

### Control of chemoselectivity in Dieckmann ring closures leading to tetramic acids

Yong-Chul Jeong,<sup>a</sup> Muhammad Anwar,<sup>a</sup> Tuan Minh Nguyen,<sup>b</sup> Benjamin Song Wei Tan,<sup>a,b</sup> Christina Li Lin Chai<sup>b,c</sup> \* and Mark G. Moloney<sup>a\*</sup>

<sup>a</sup> *Chemistry Research Laboratory, University of Oxford, Mansfield Rd, University of Oxford, OX1 3TA, U.K.*

Tel: +44 1865 275656; e-mail: [mark.moloney@chem.ox.ac.uk](mailto:mark.moloney@chem.ox.ac.uk)

<sup>b</sup> *Institute of Chemical and Engineering Sciences, Agency for Science, Technology and Research (A\*STAR), 8 Biomedical Grove, Neuros, #07-01, Singapore 138665*

<sup>c</sup> *Department of Pharmacy, National University of Singapore, 18 Science Drive 4, Singapore 117543*

Tel: +65 6799-8522; e-mail: [christina\\_chai@ices.a-star.edu.sg](mailto:christina_chai@ices.a-star.edu.sg)

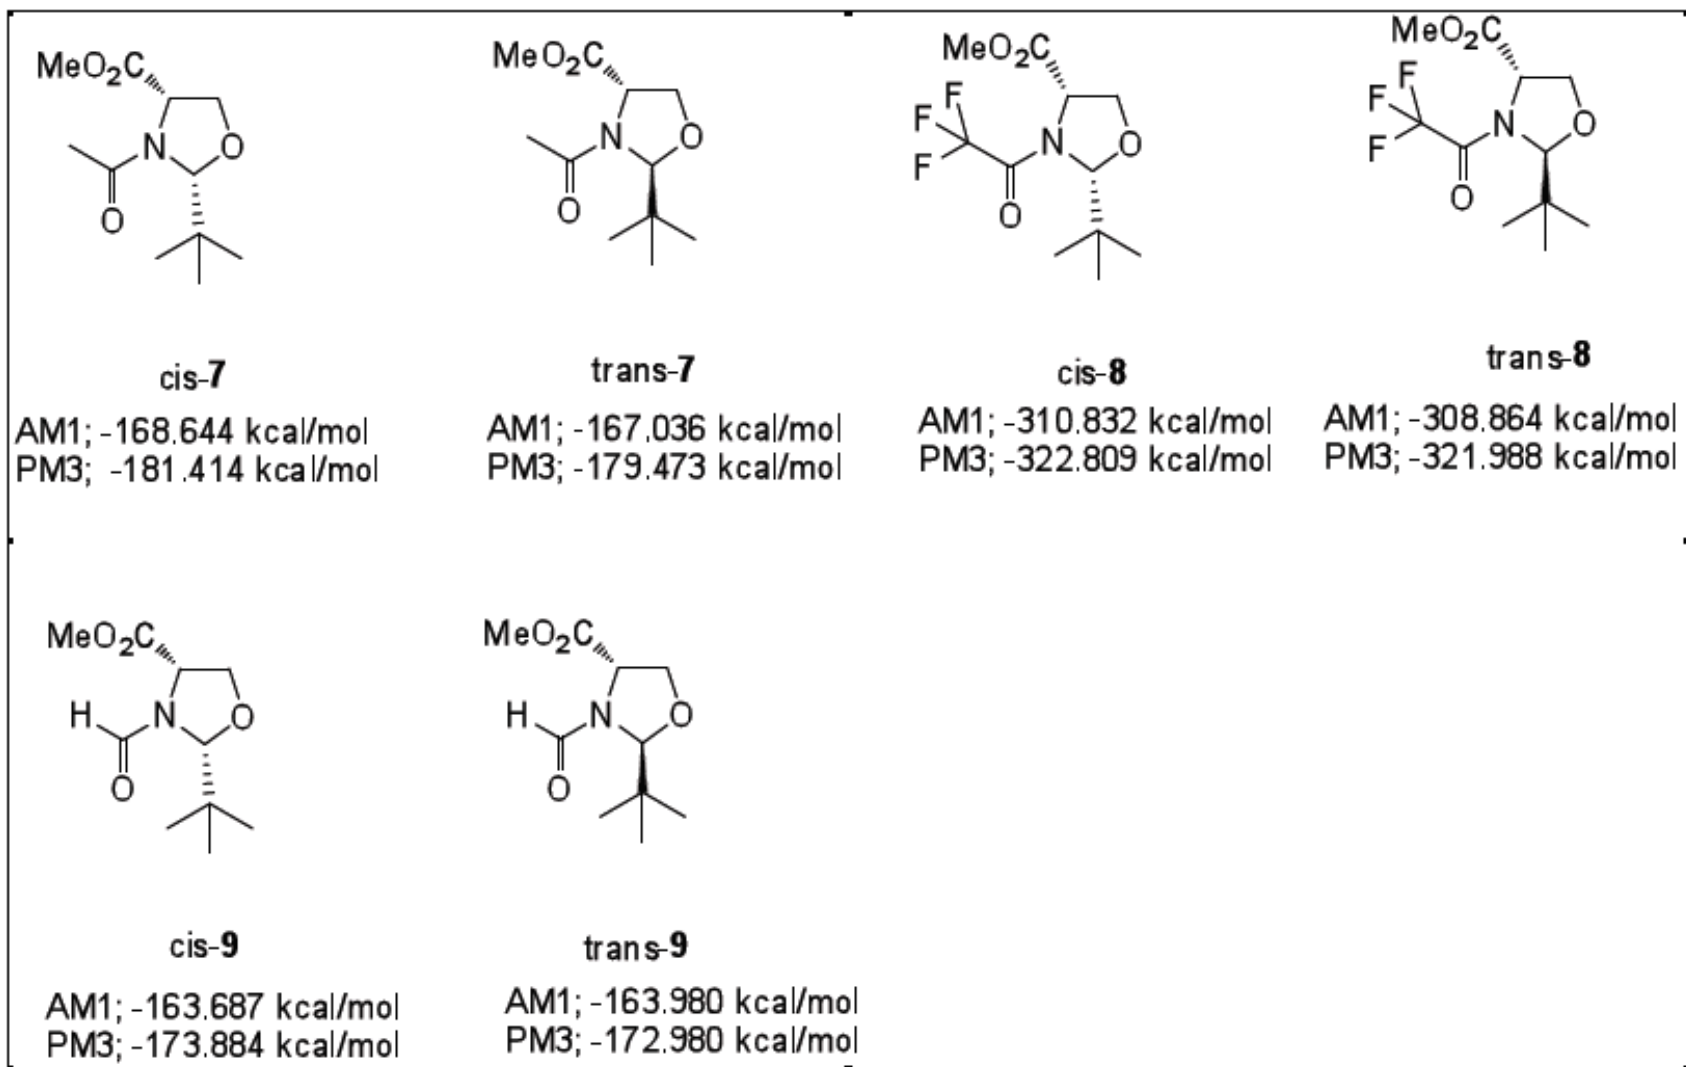

Jan18-2010-50.002.001.1.mps

VerticalScaleFactor = 1

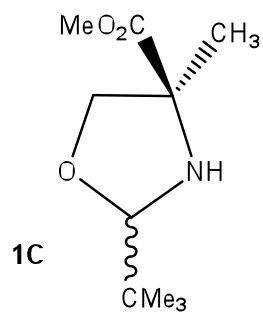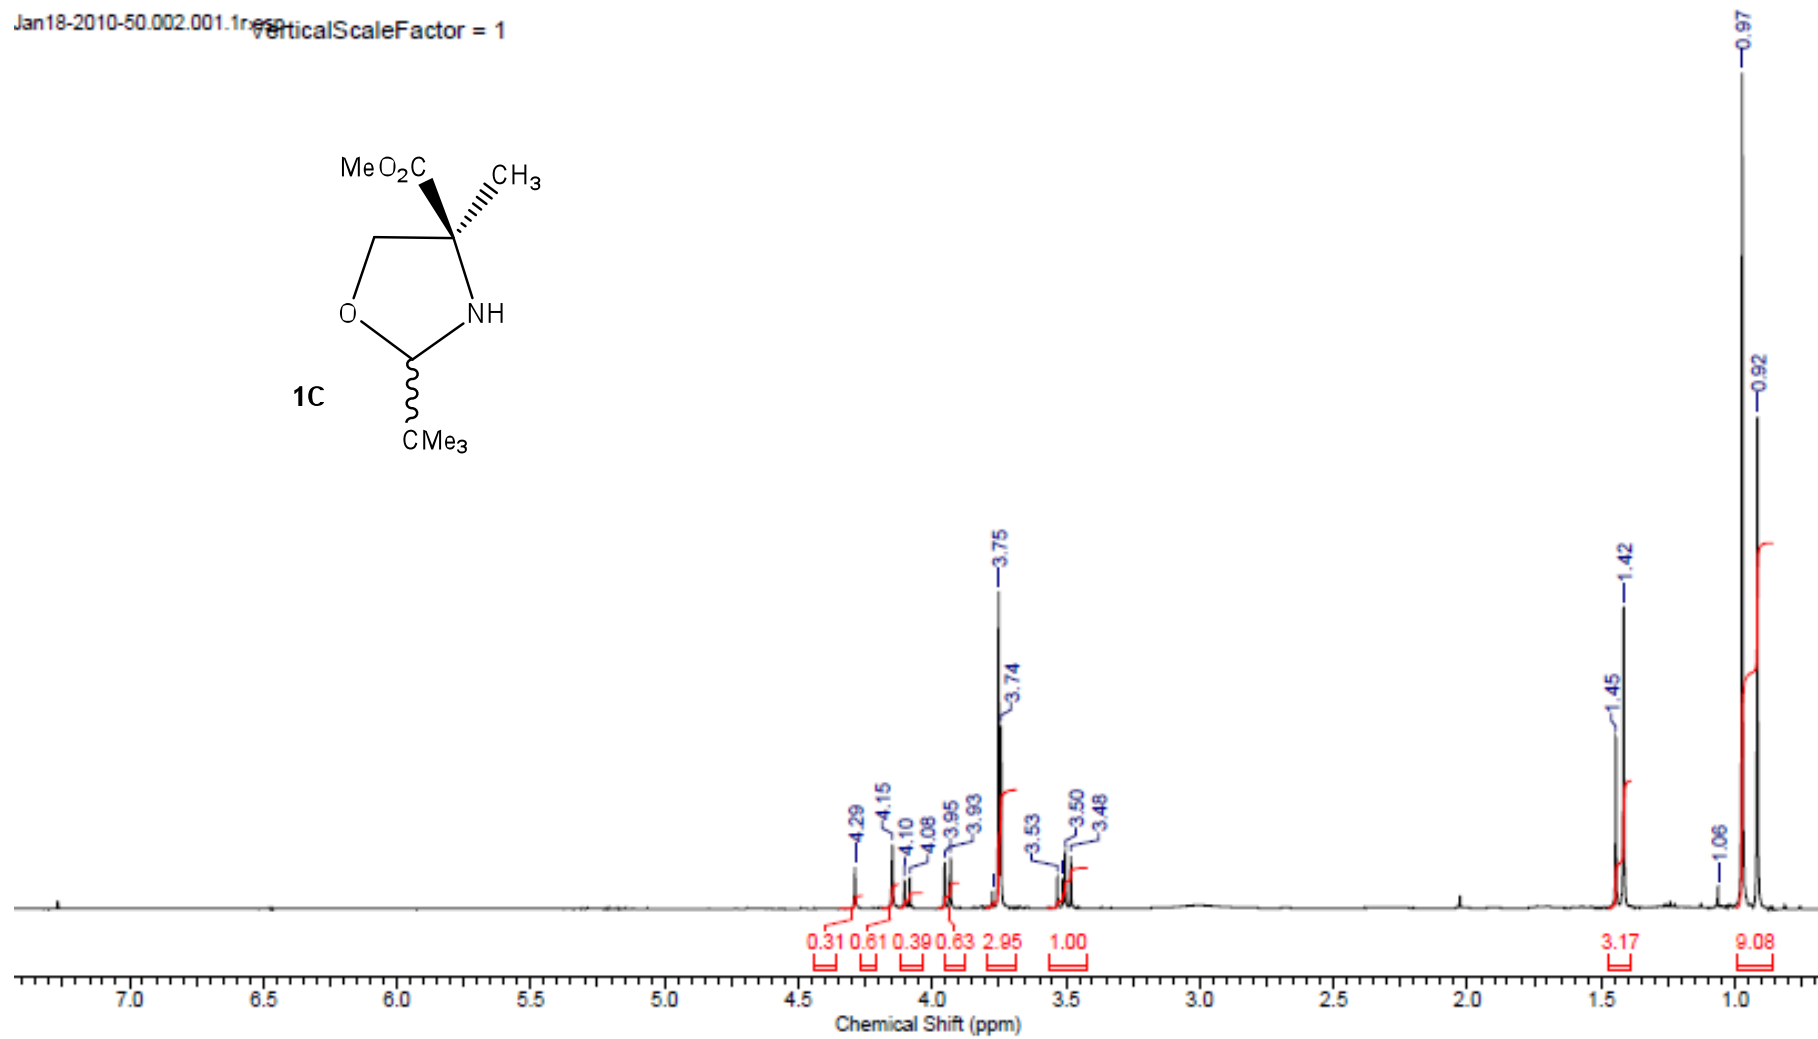

Dec29-2009-13.001.esp VerticalScaleFactor = 1

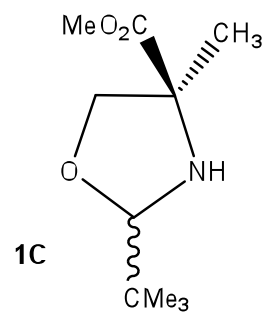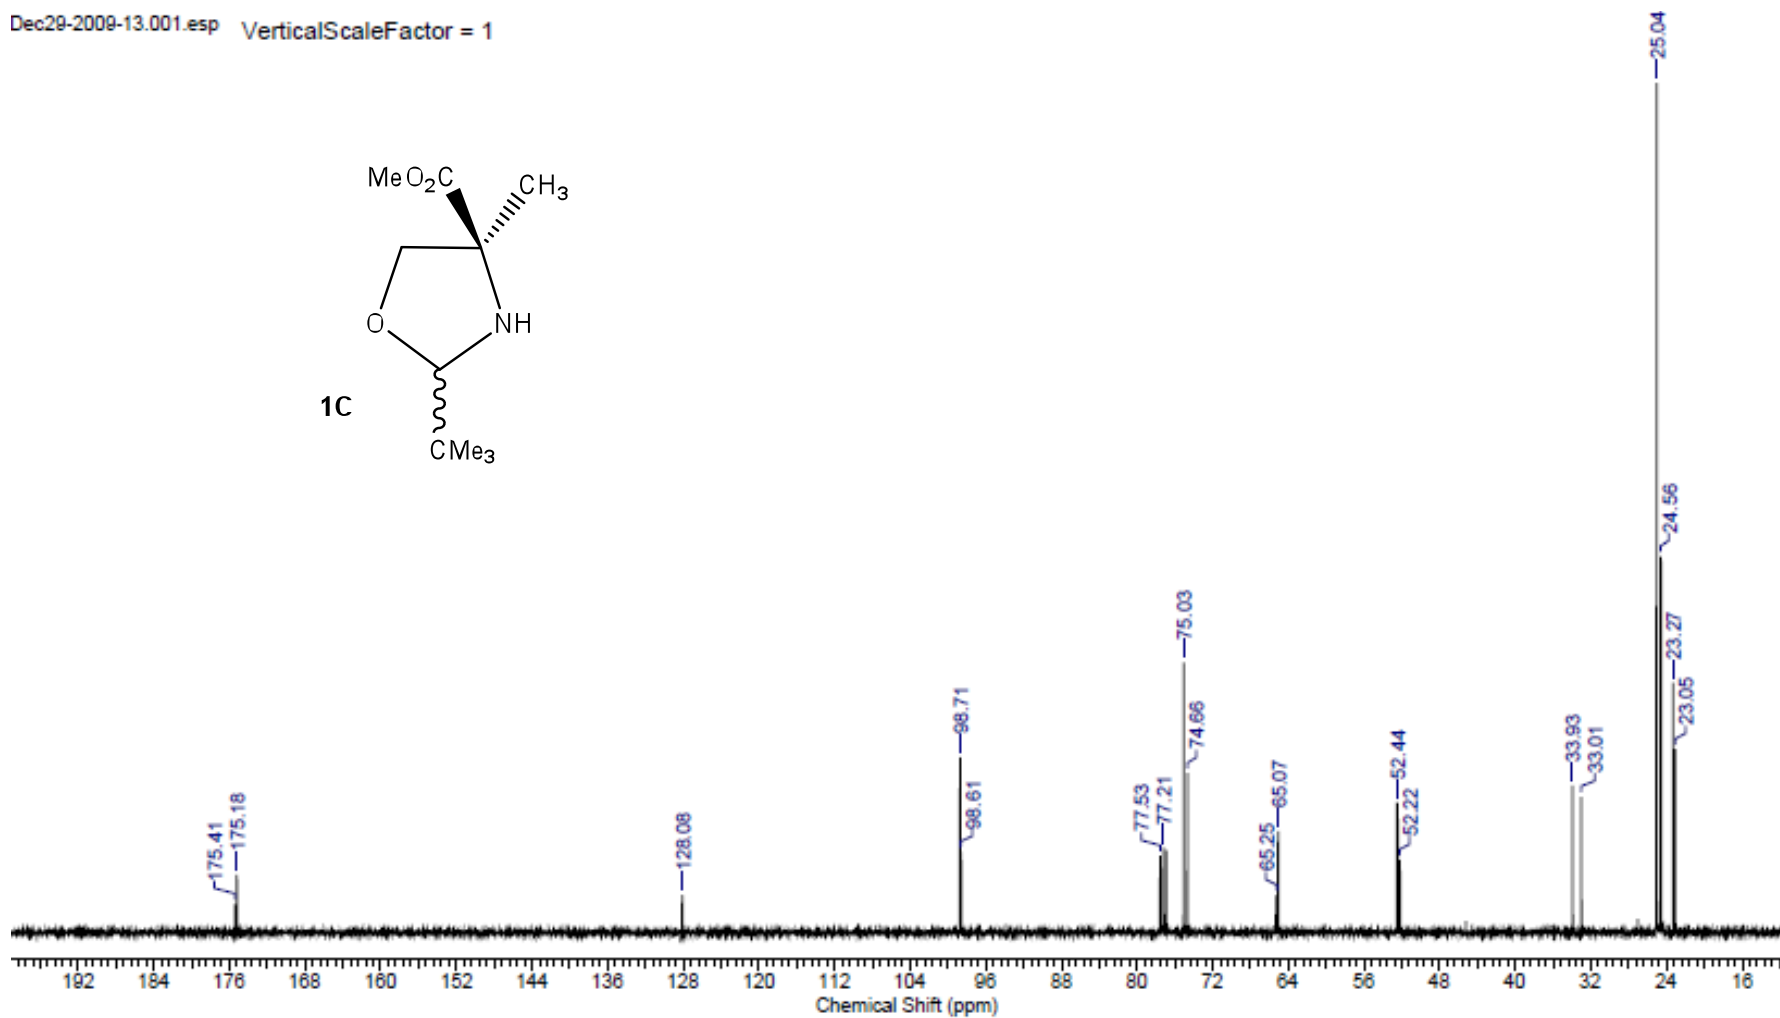

Mar16-2010-49.001.001.1n958

VerticalScaleFactor = 1

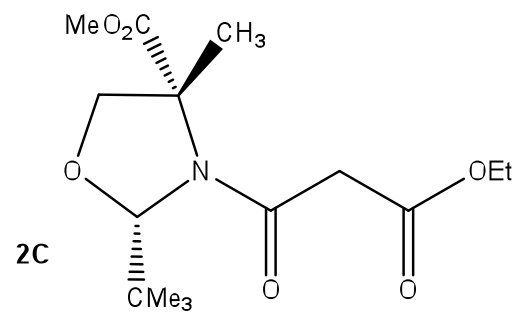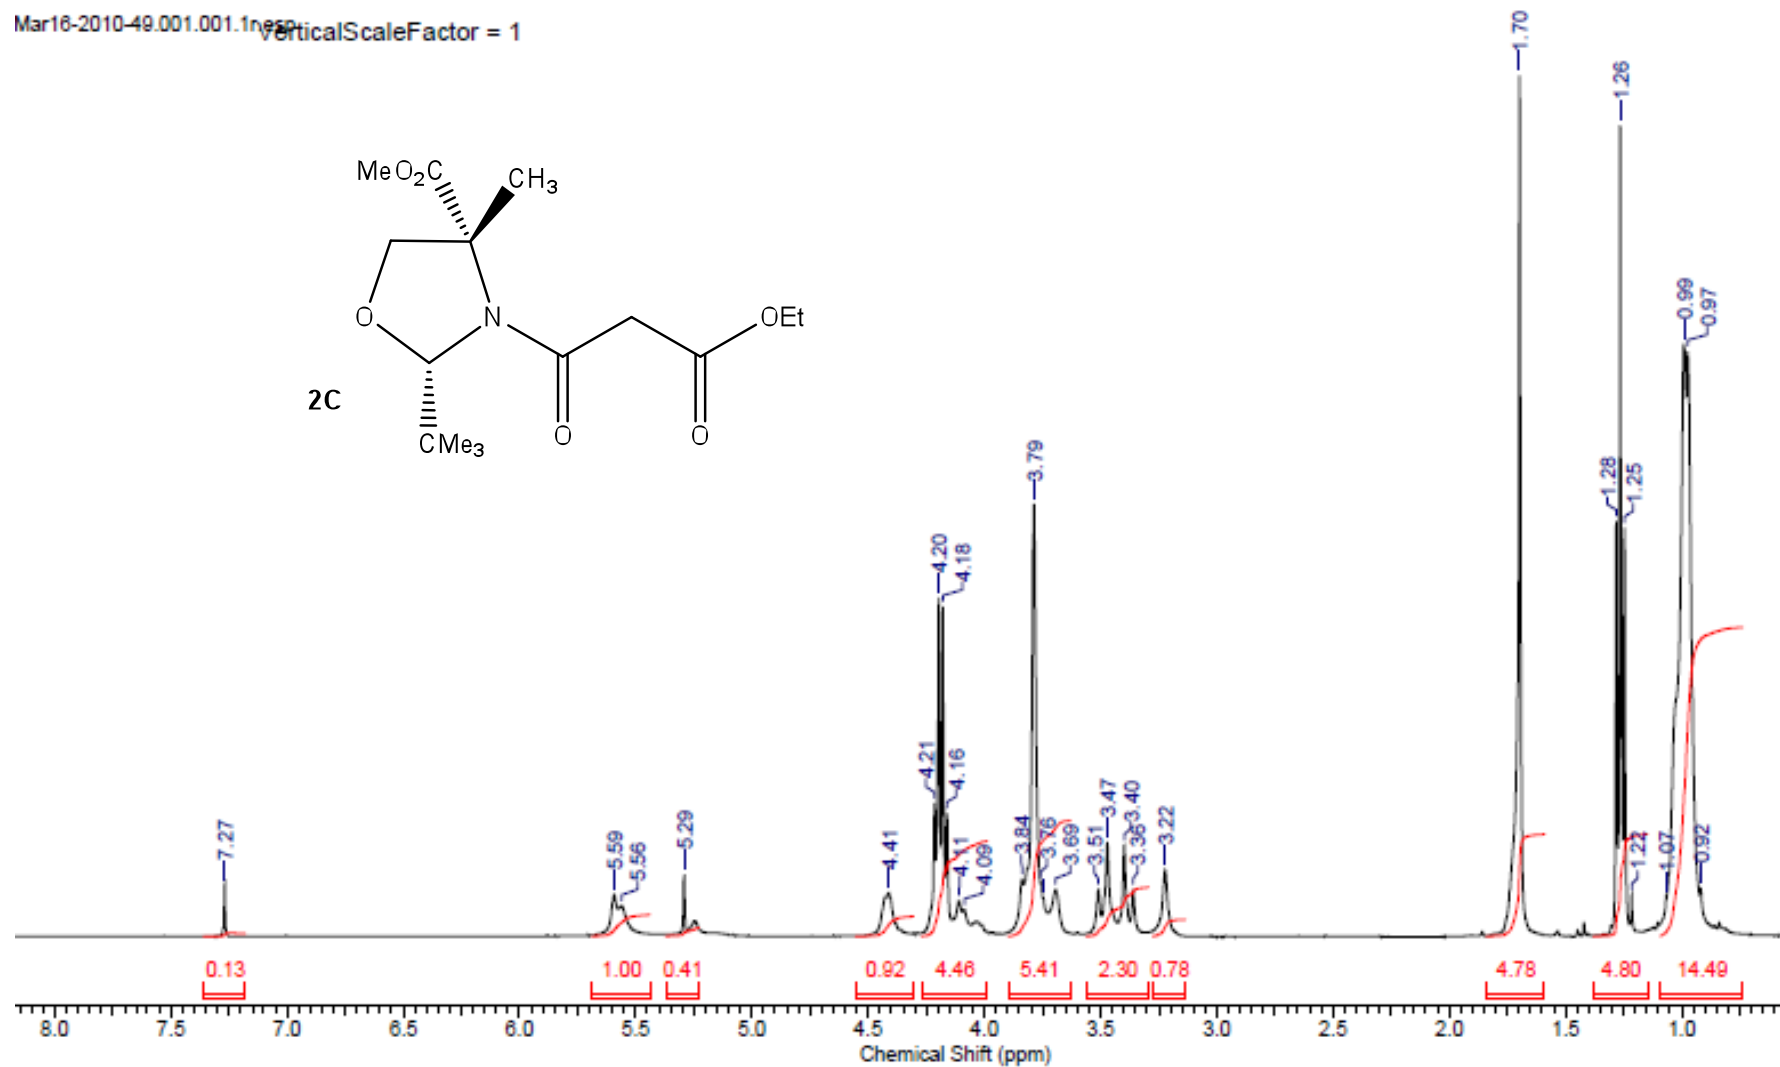

Jul12-2010-55.002.esp VerticalScaleFactor = 1

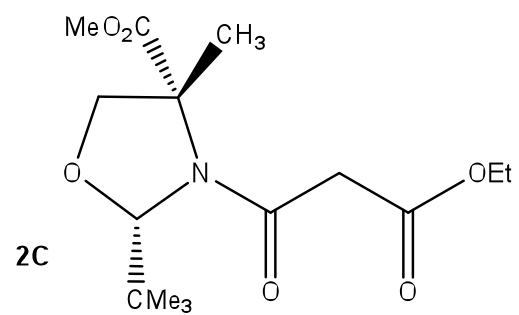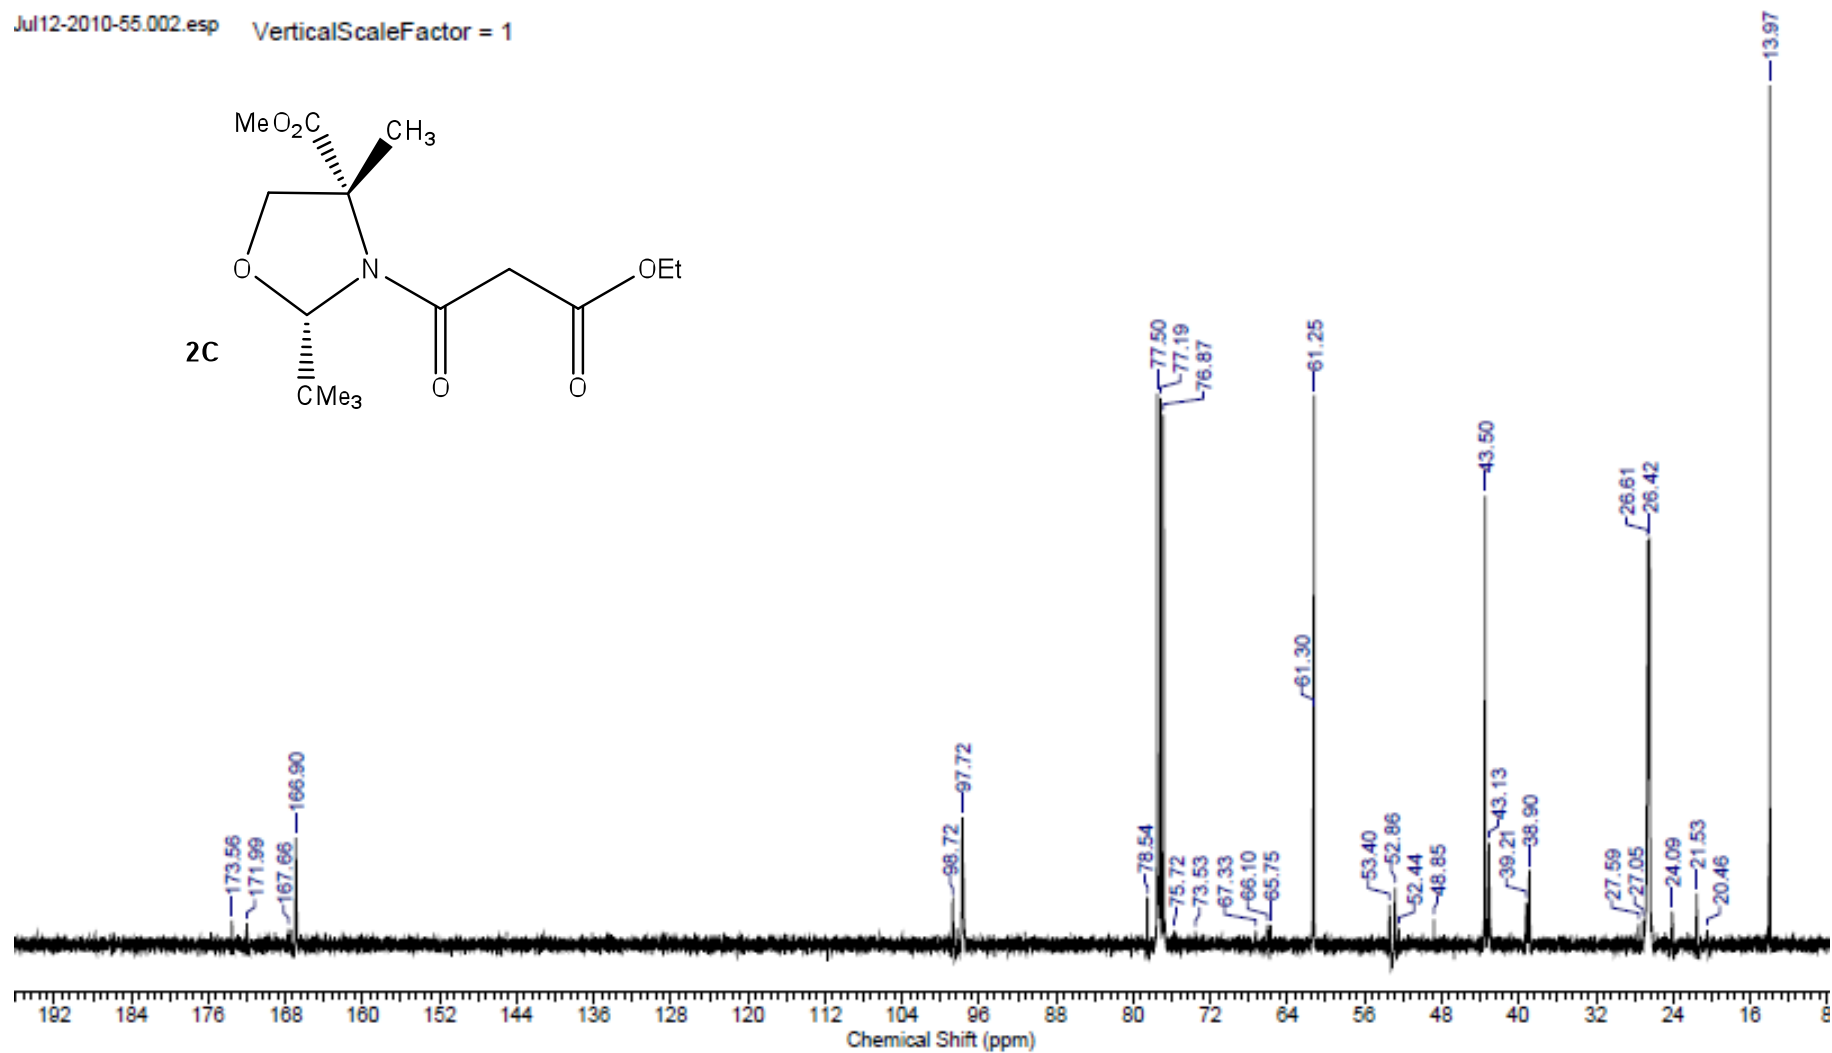

Aug17-2010-18.001.001.1n155P

VerticalScaleFactor = 1

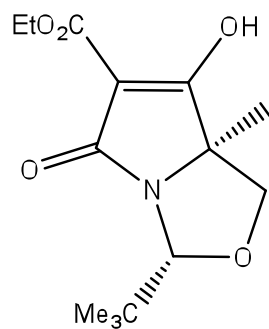

(±)-5b

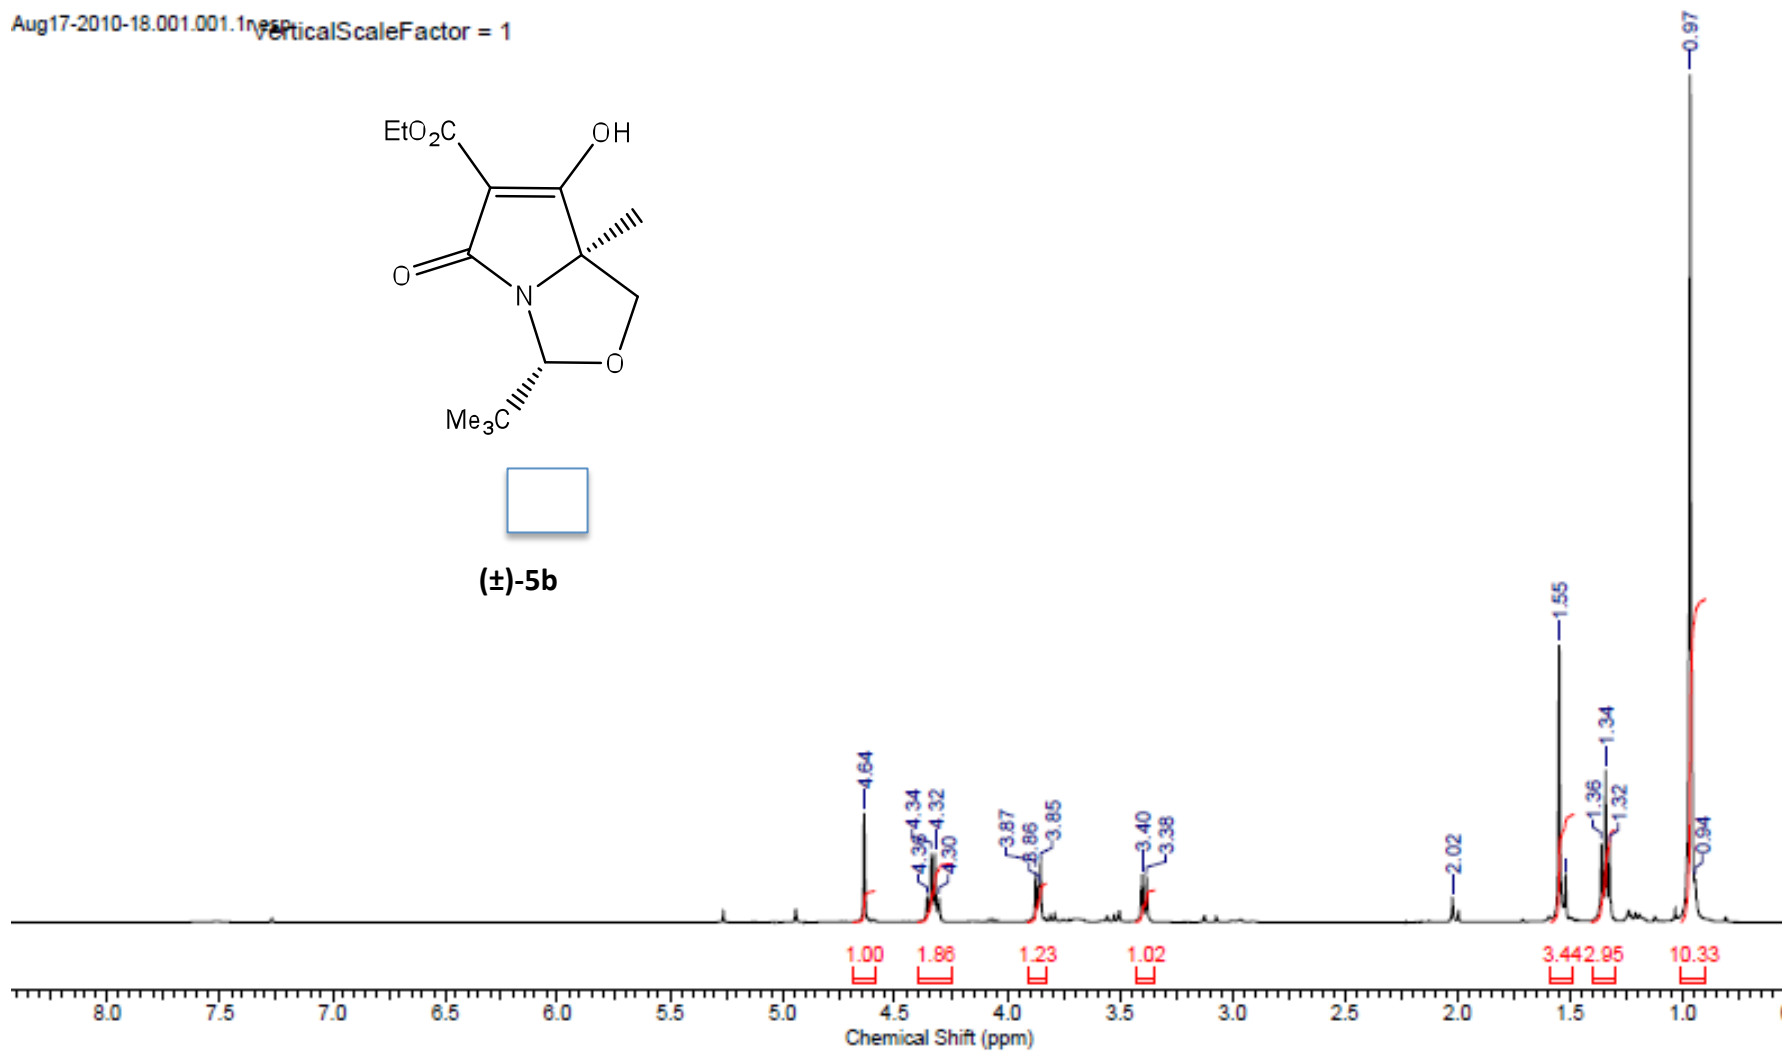

Aug17-2010-18.002.001.1.nmr  
VerticalScaleFactor = 1

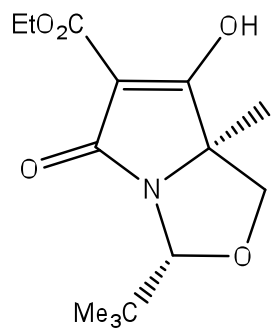

(±)-5b

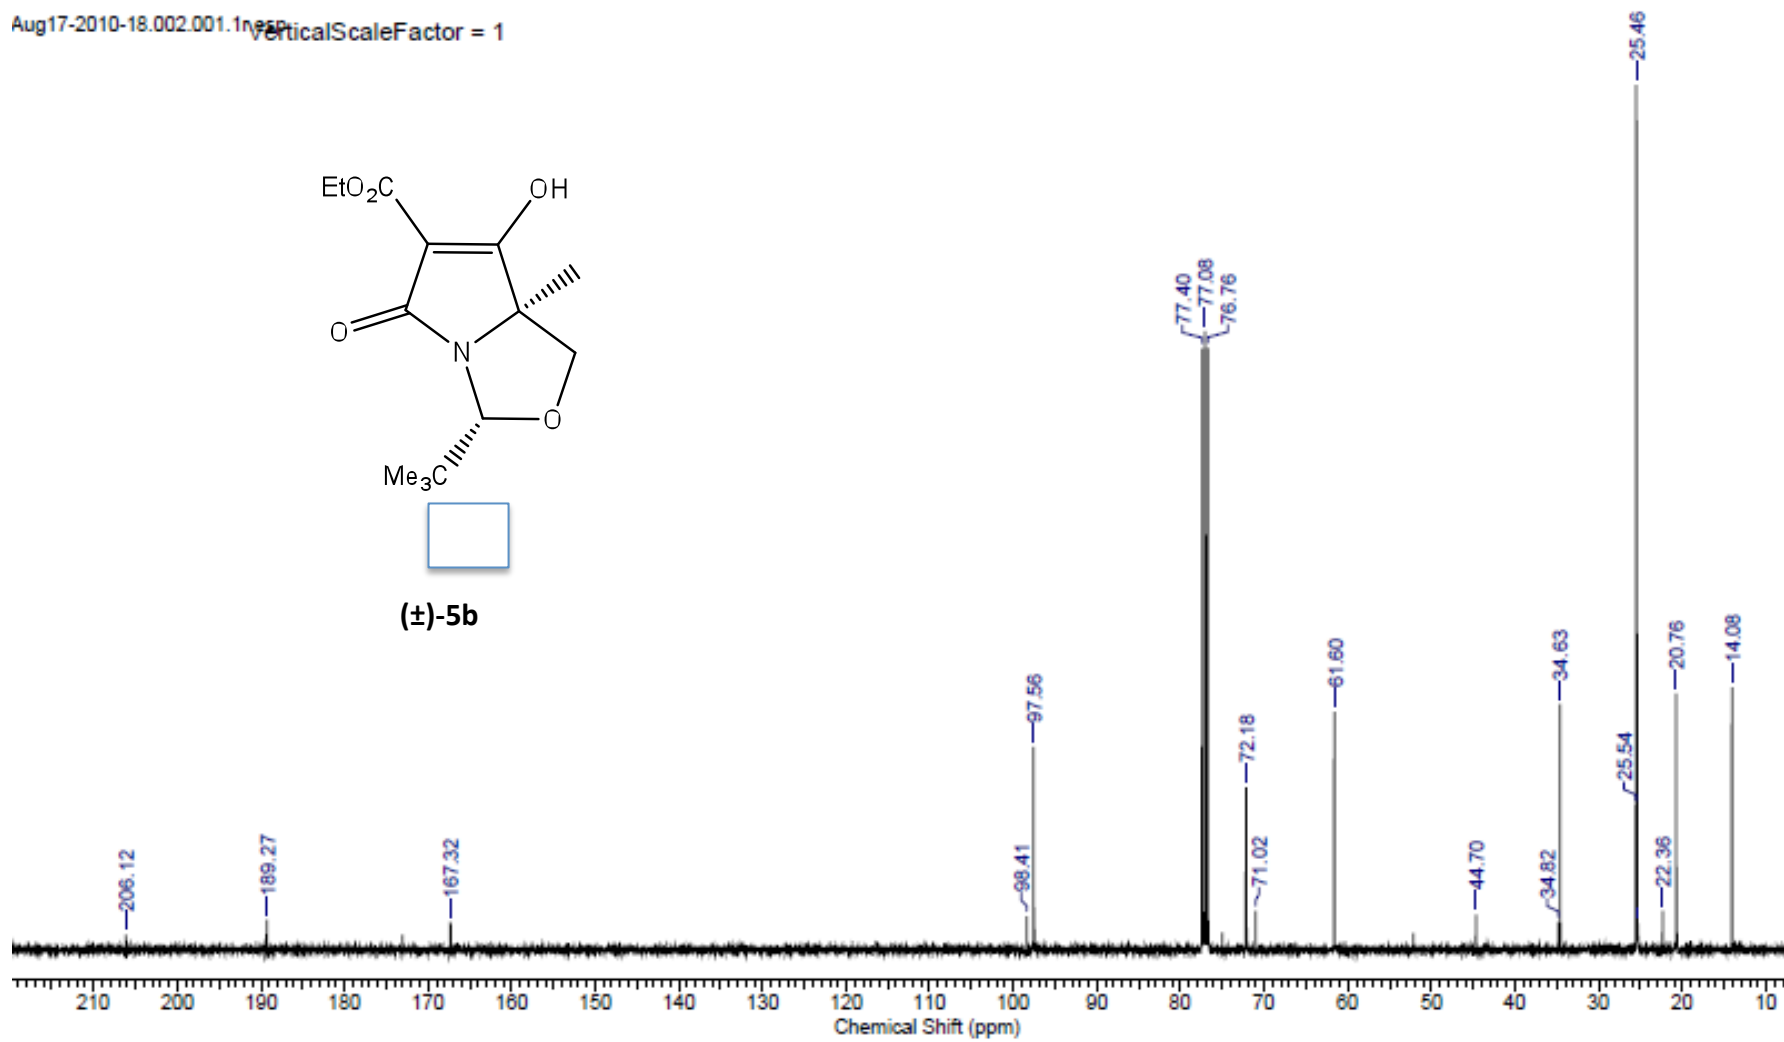



Mar29-2011-33.001.001.1n.pdf  
VerticalScaleFactor = 1

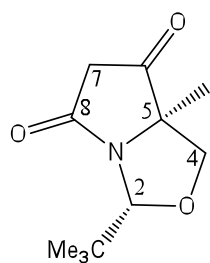

**(±)-6b**

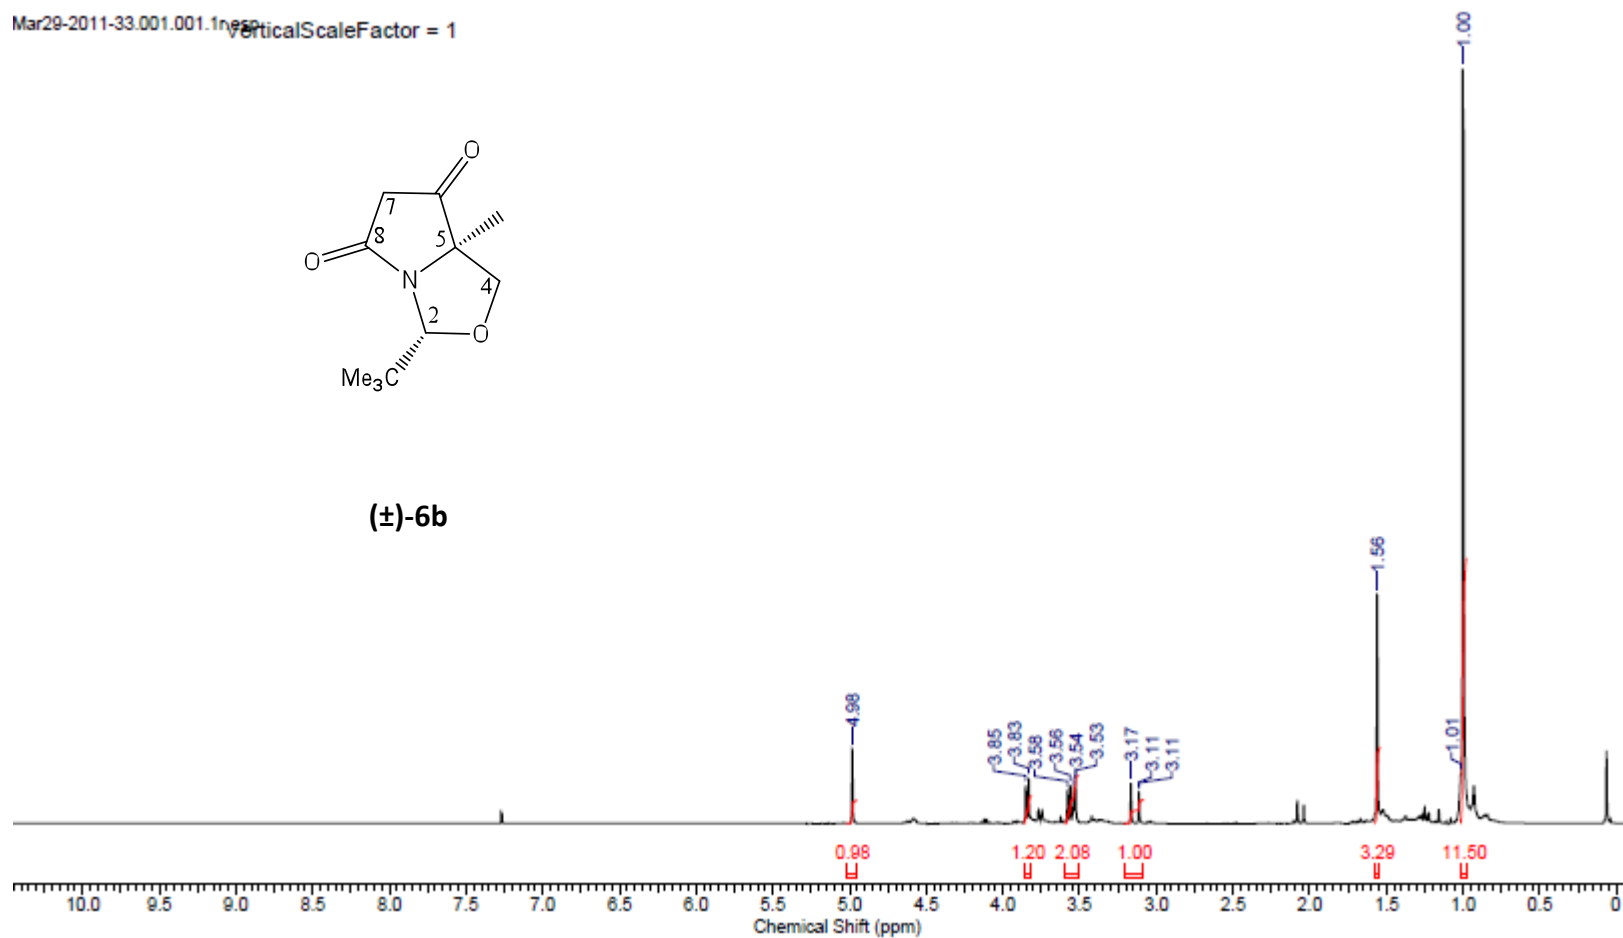

Mar30-2011-42.001.001.1.nmr VerticalScaleFactor = 1

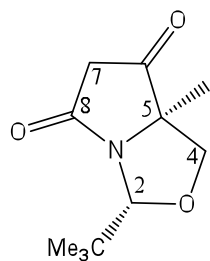

(±)-6b

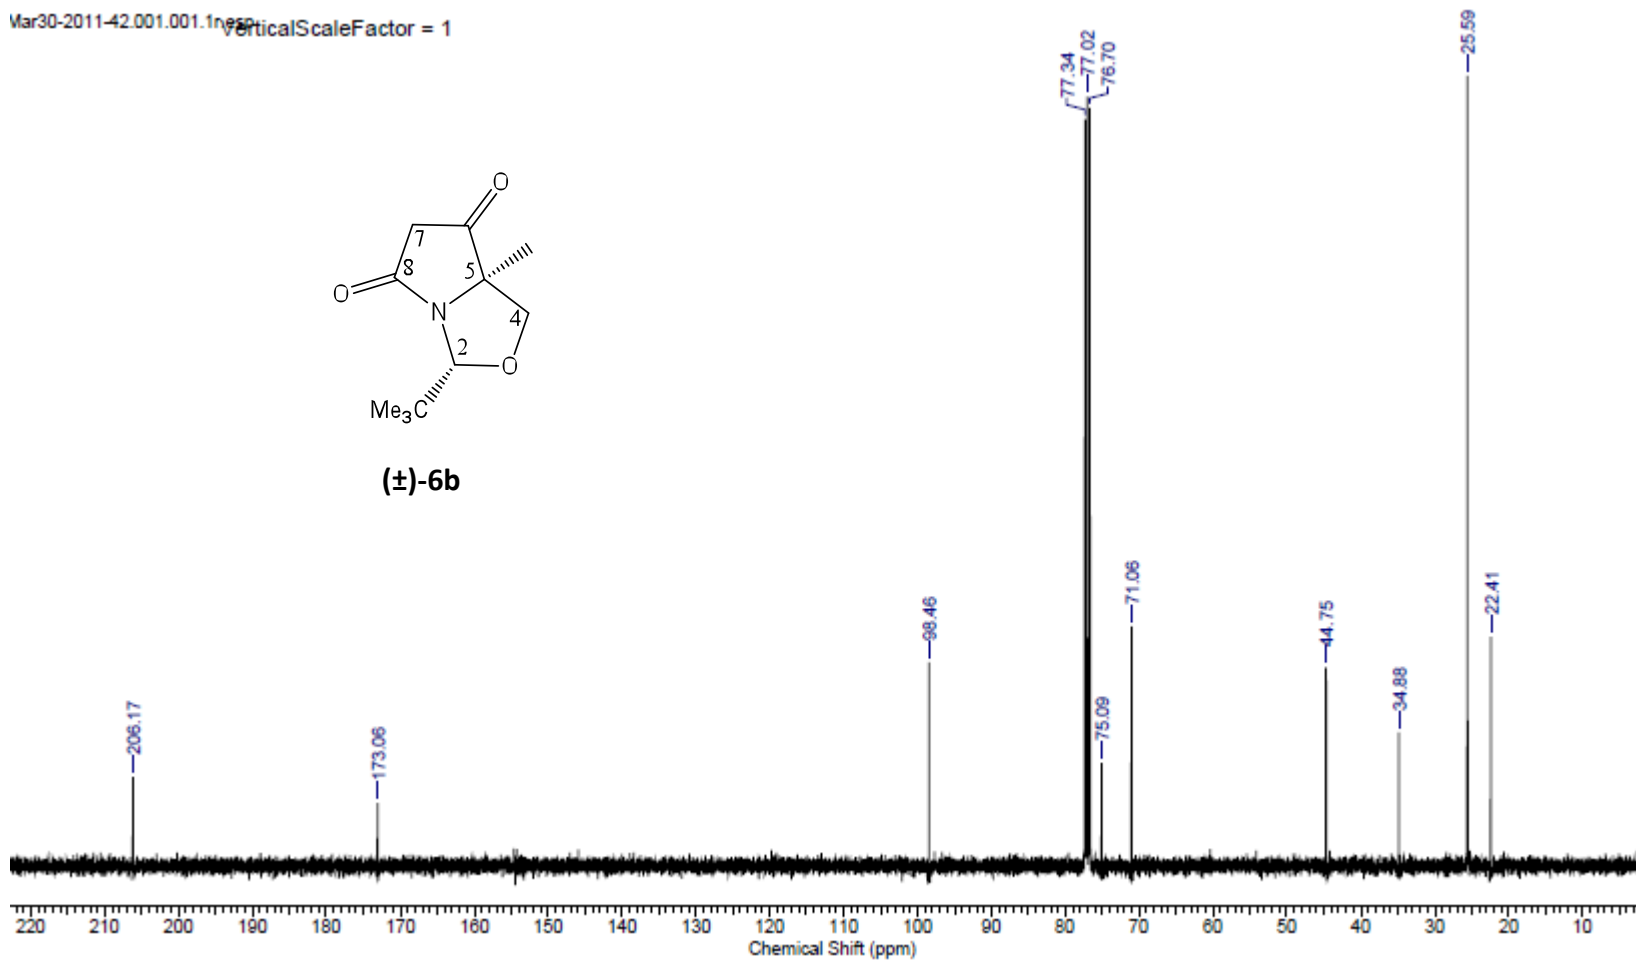

t27482802.004.AVB500\_TSM1\_057\_S021\_Hat\_90deg\_C.esp  
Vertical Scale factor = 1

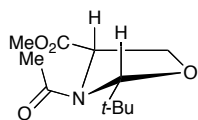

7

67°C in CDCl<sub>3</sub>

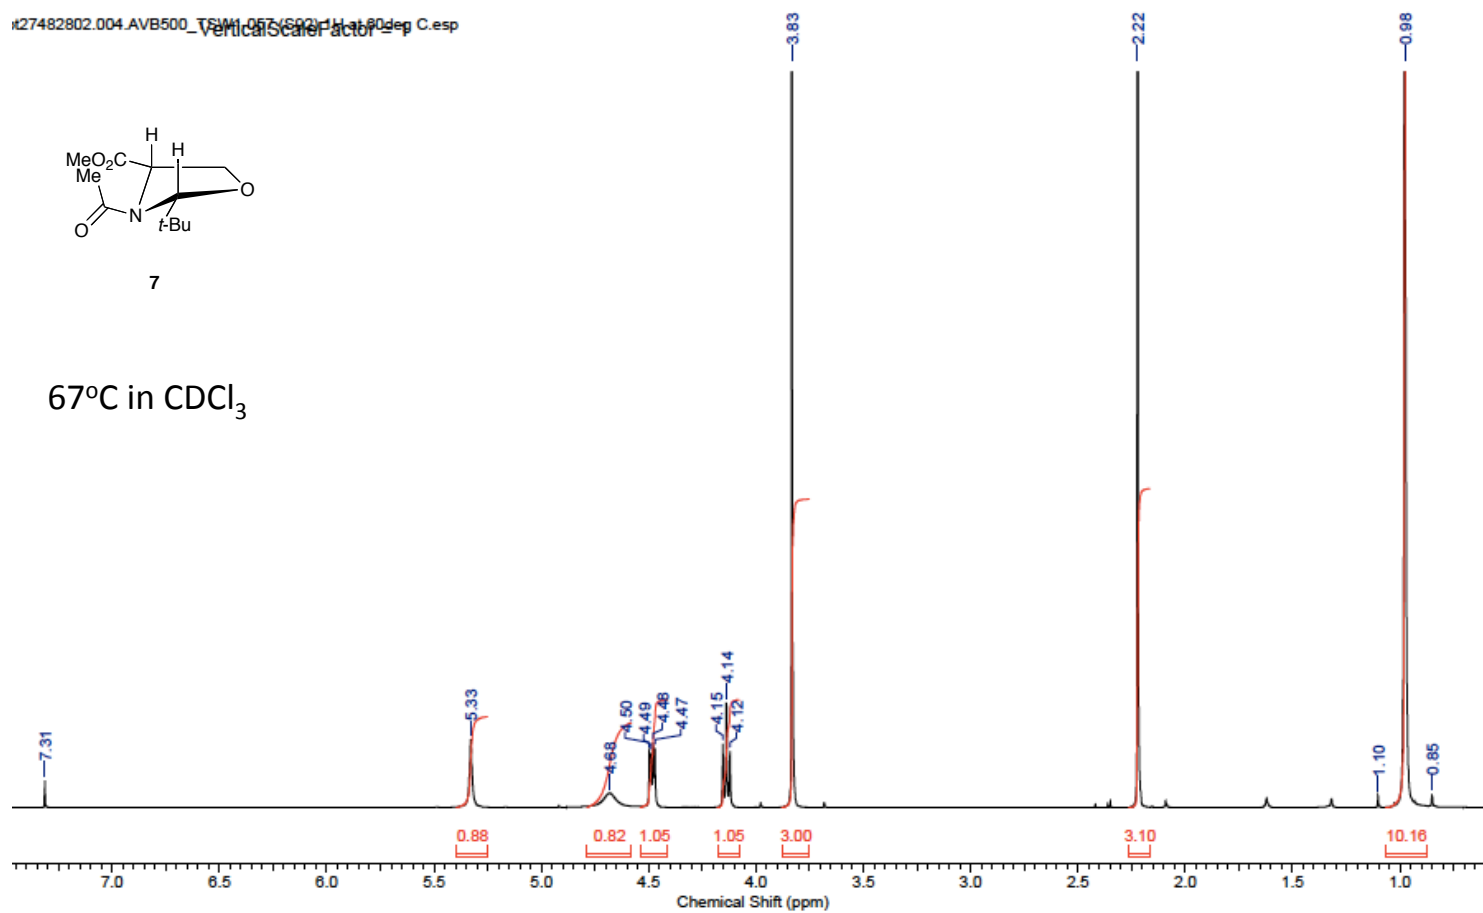

128220103.001.Calamari\_Org\_128220103\_001\_H-1.ppt  
Vertical Scale factor = 1

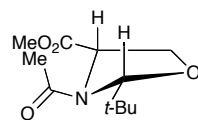

7

90°C in DMSO

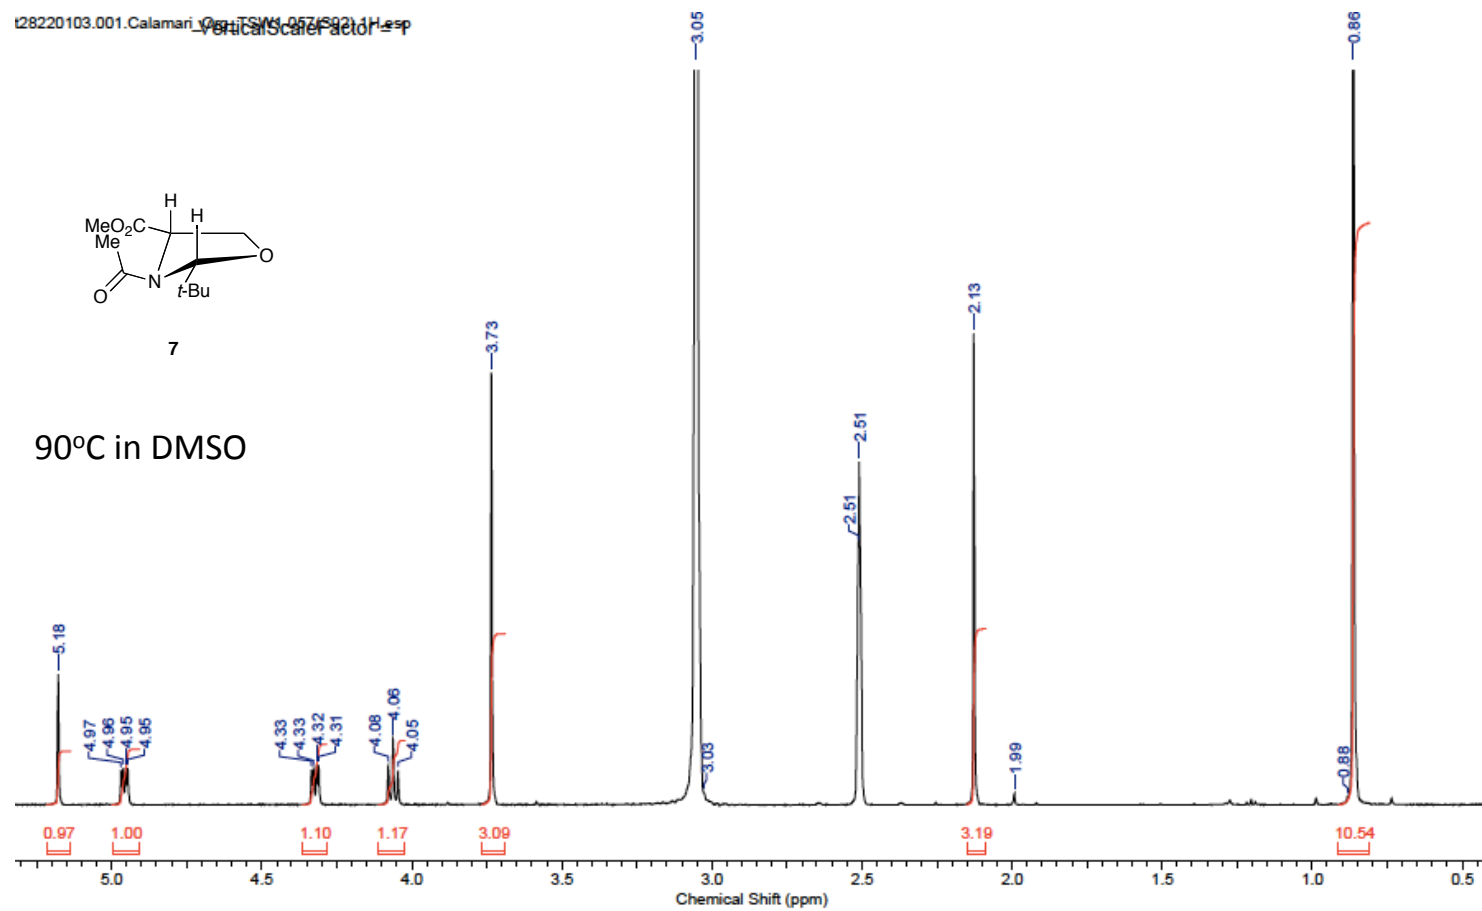

d27482302.001.AVC500\_TSM1-055(S93)-130 aff- 1

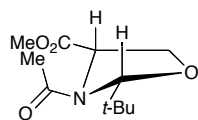

7

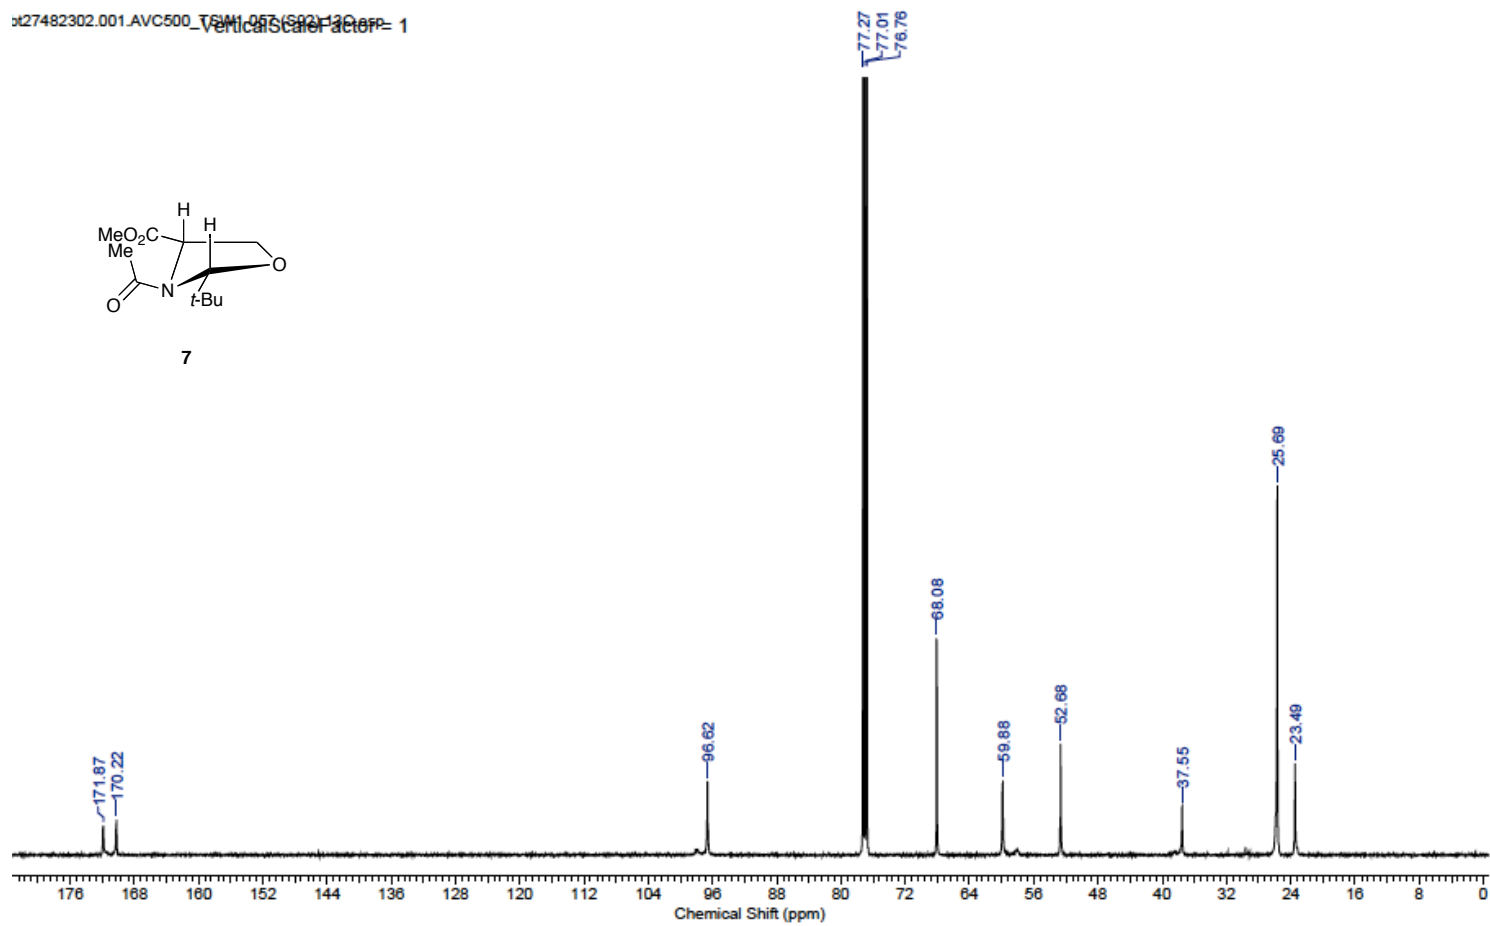

Feb 16 2011 15:00:08.DQX400-005.F8-2.HF50  
Vertical Scale Factor = 1

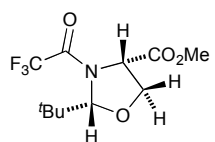

8a

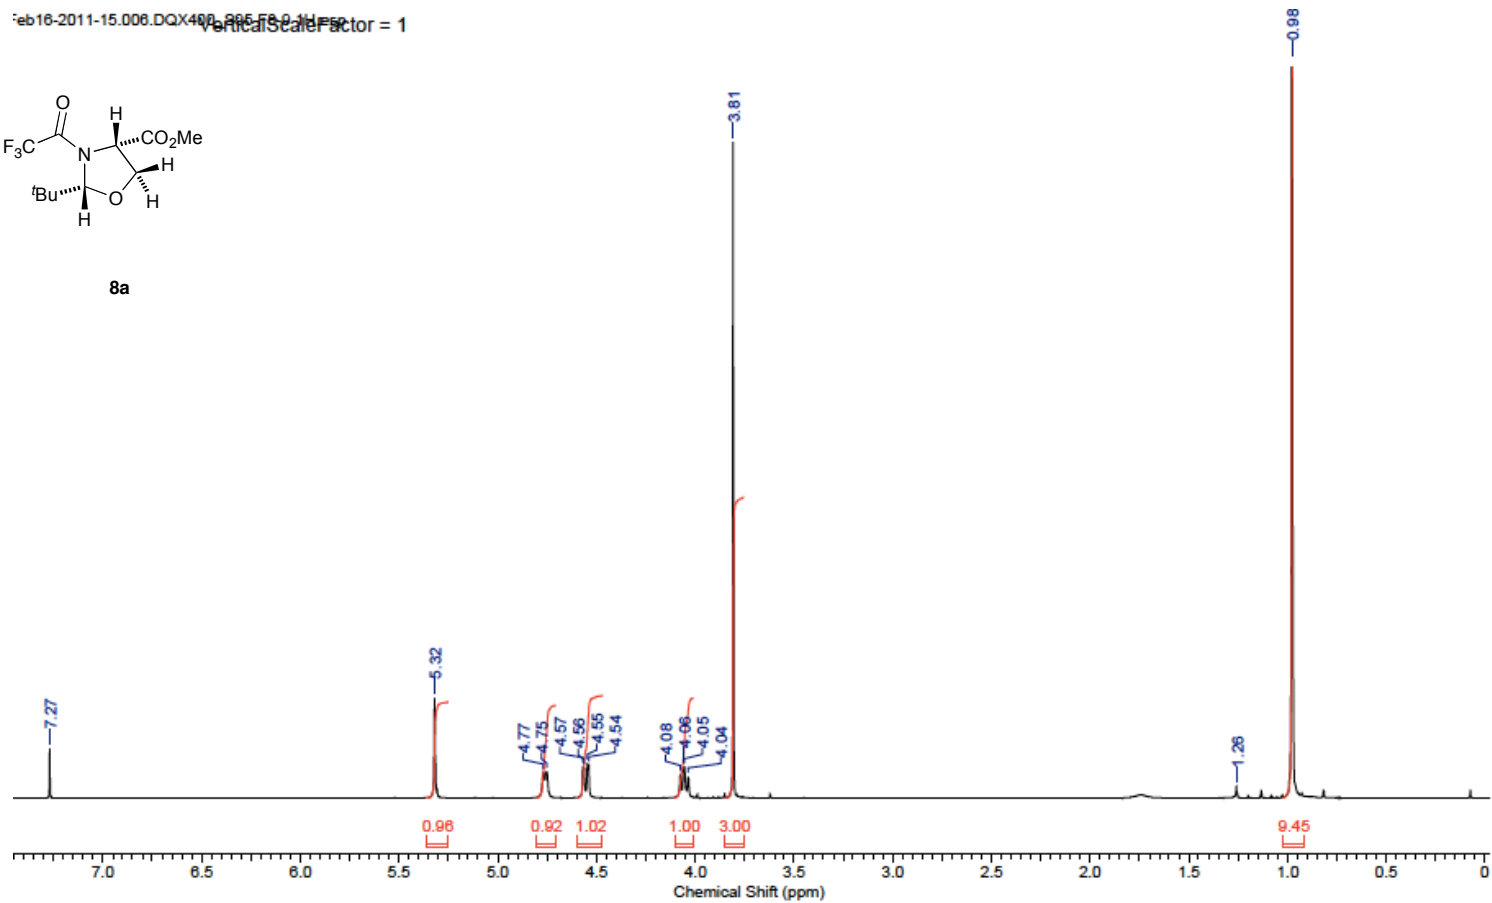

127040103.001.AVC500\_545-125.F2  
Vertical Scale Factor = 1

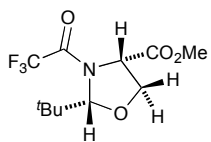

8a

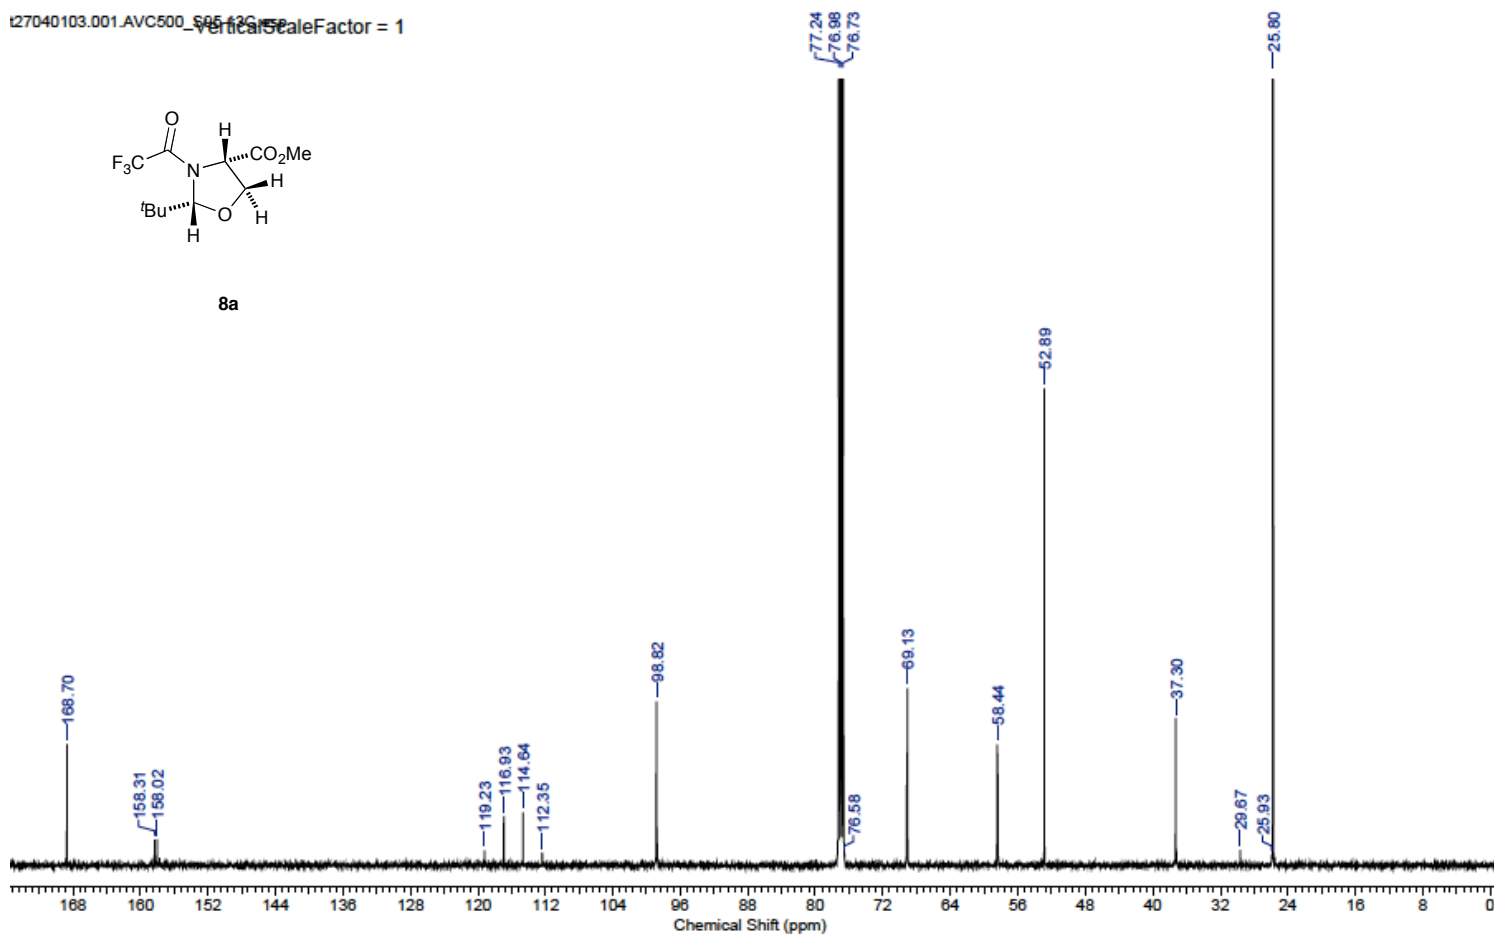

Feb17-2011-18.001.DQX400-896-04-120-1116  
Vertical Scale Factor = 1

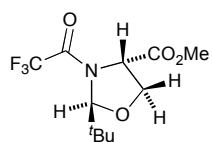

8b

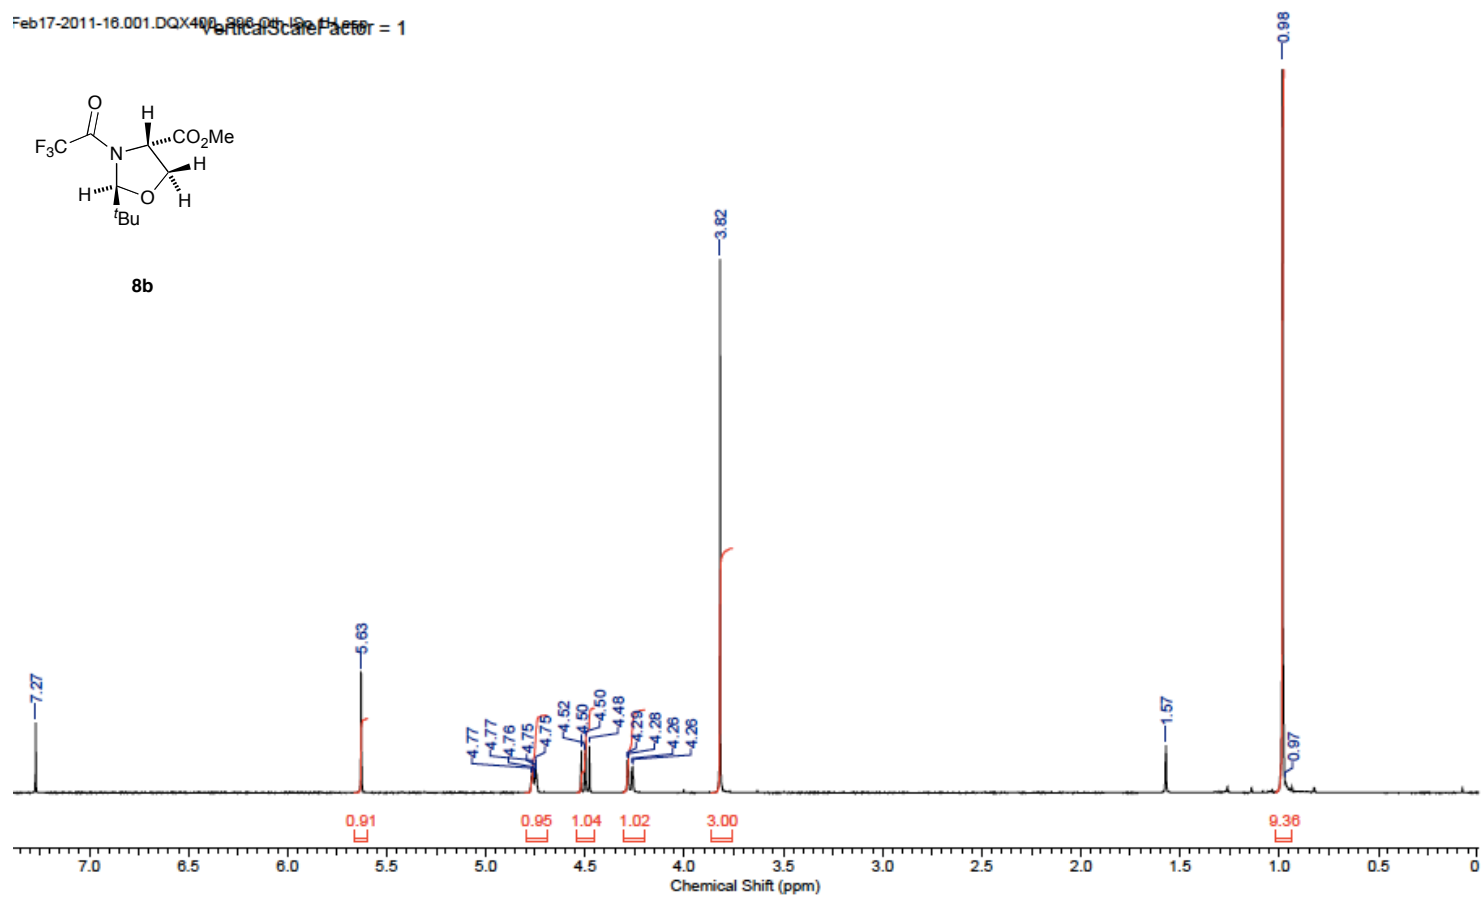



127052802.001.AVC500\_585 (Chemical Shift) 12 P 551  
Vertical Scale Factor = 1

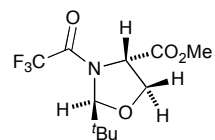

8b

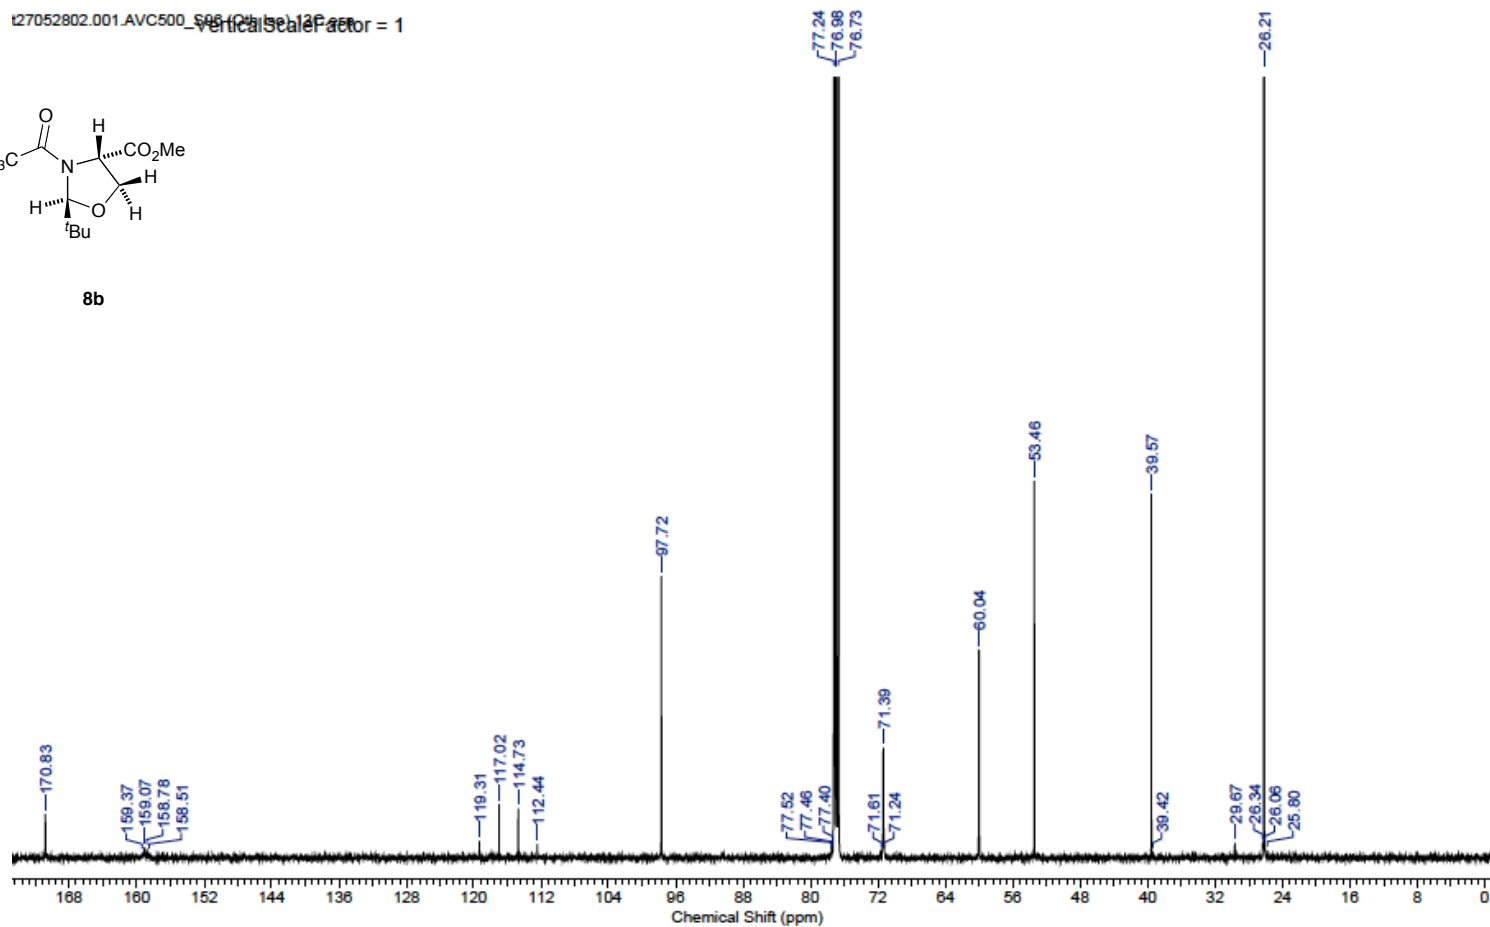

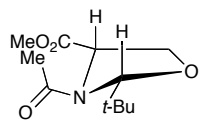

7

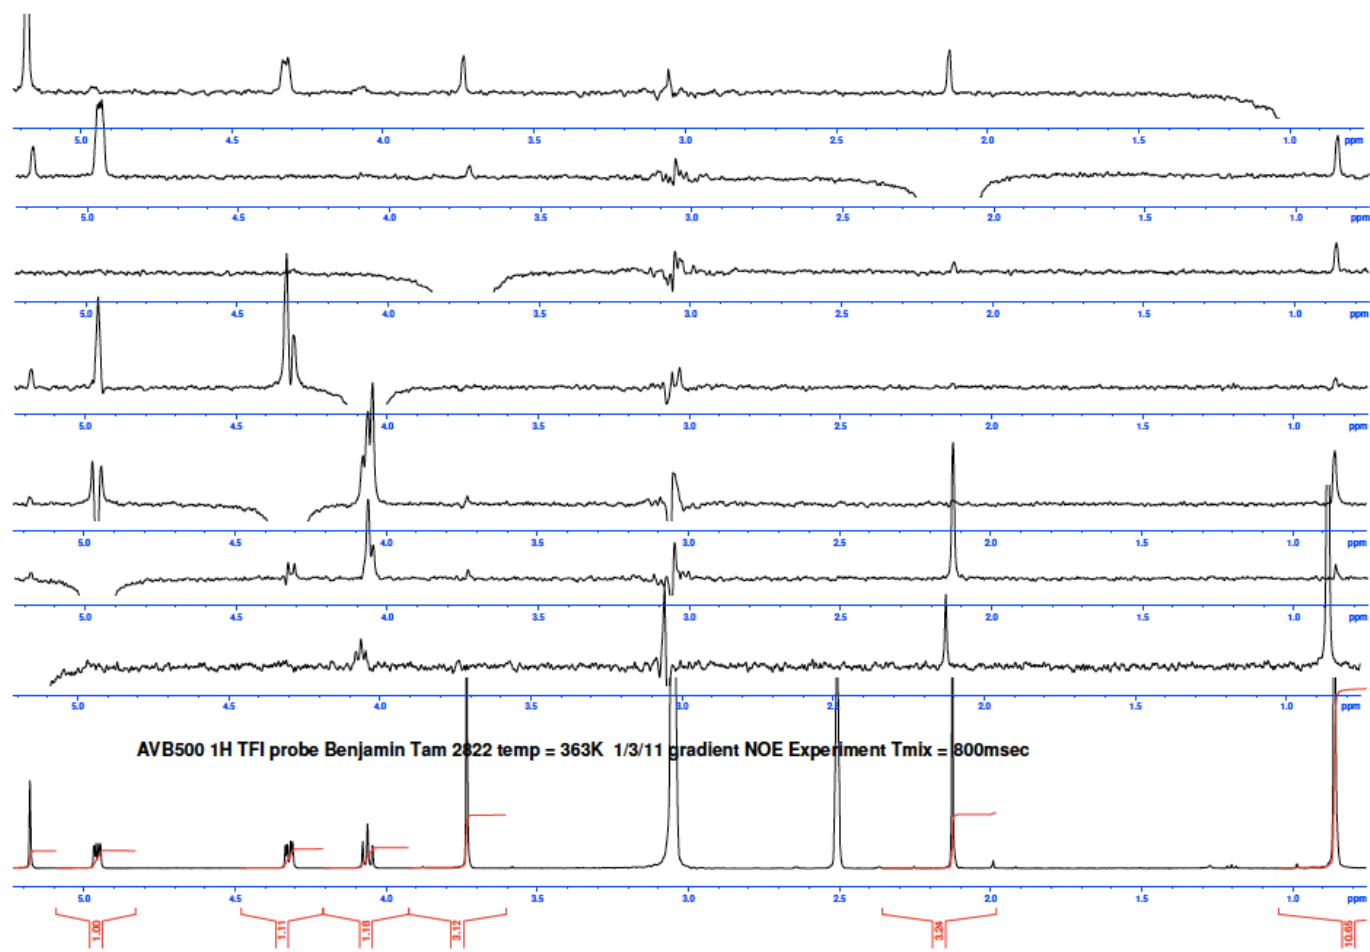

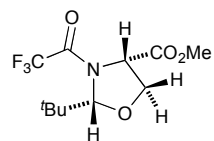

8a

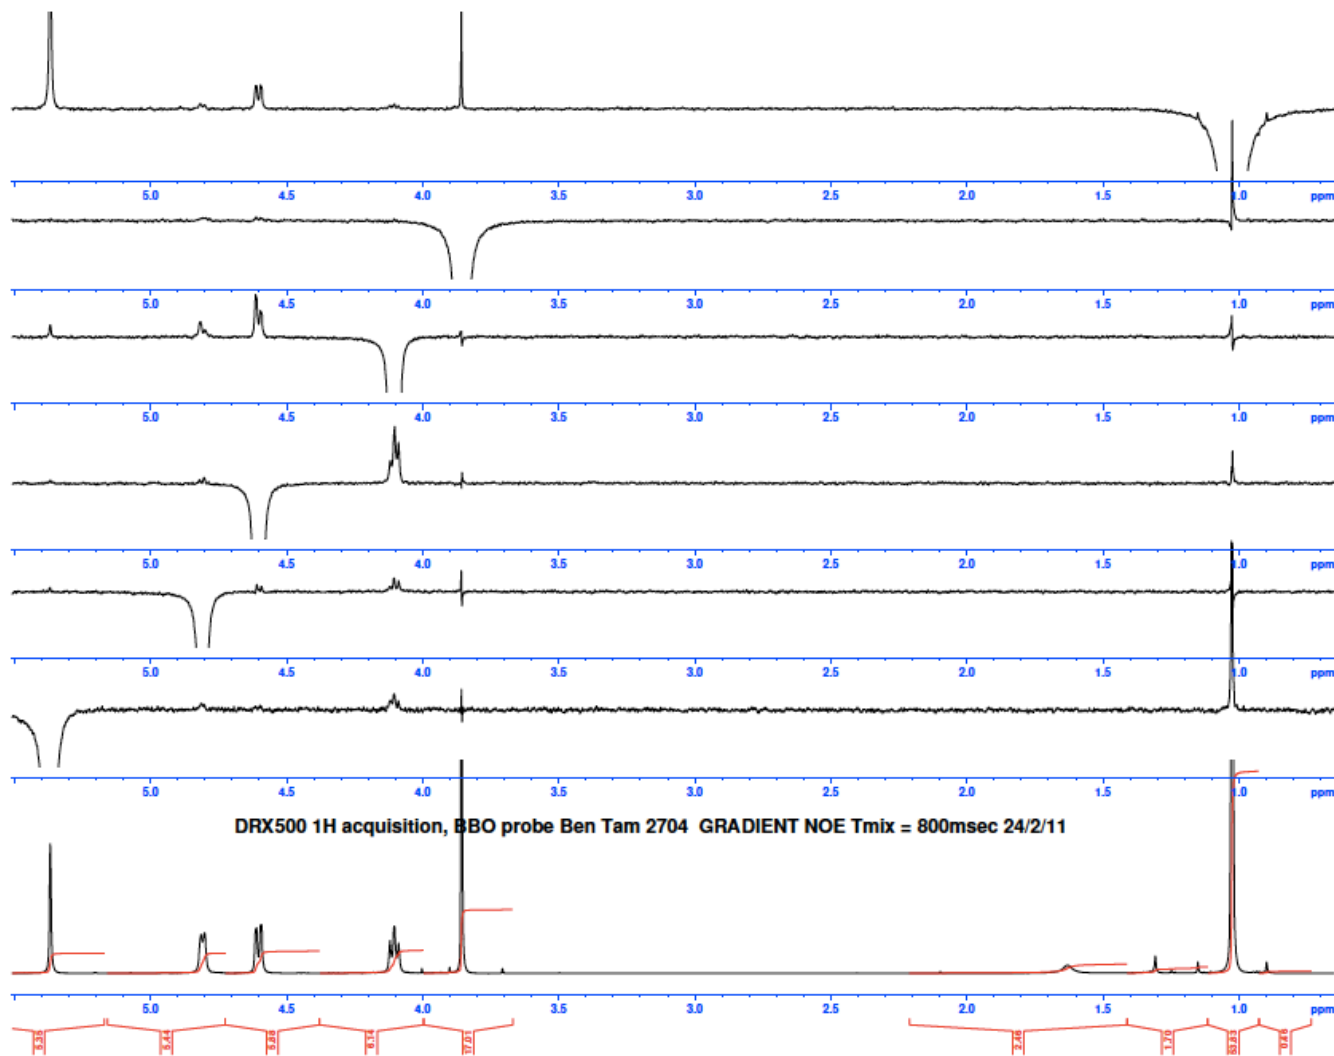

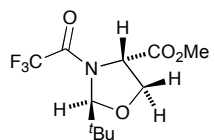

8b

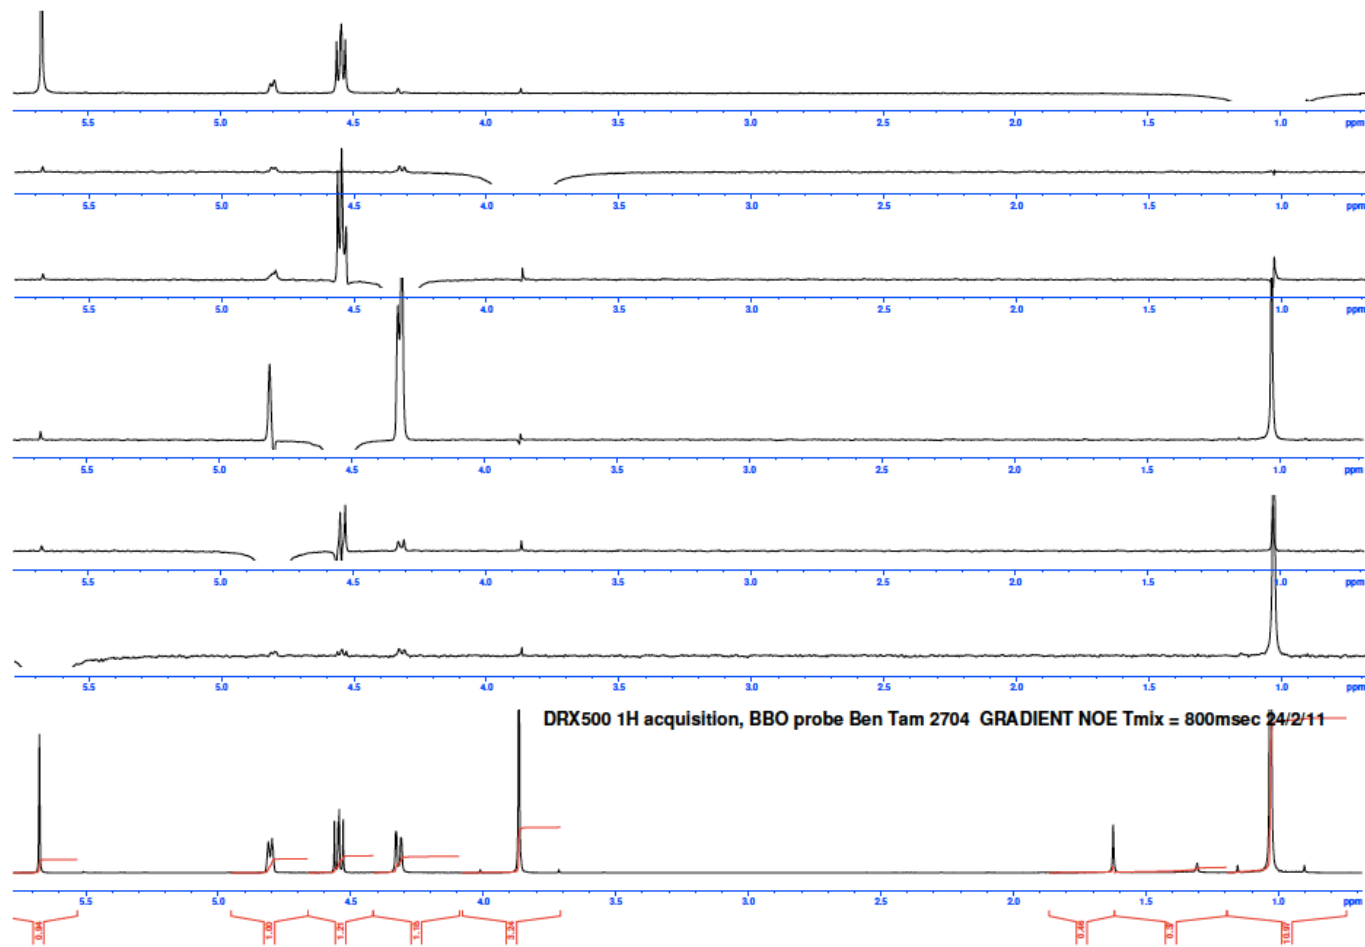

Supplement: c1ob05816a.pdf [file c1ob05816a.pdf]
